# Supplementary material for: 3D Interconnected Boron Nitride Networks in Epoxy Composites via Coalescence Behavior of SAC305 Solder Alloy as a Bridging Material for Enhanced Thermal Conductivity
Source: PubMed Central journal article supplement (PMC7564005; doi:10.3390/polym12091954), 2020-08-28
Supplement: polymers-12-01954-s001.pdf [file polymers-12-01954-s001.pdf]

# Supplementary material

## 3D interconnected boron nitride networks in epoxy composites via coalescence behavior of SAC305 solder alloy as a bridging material for enhanced thermal conductivity

Youjin Kim and Jooheon Kim\*

School of Chemical Engineering and Materials Science, Chung-Ang University,

Seoul 156-756, Republic of Korea

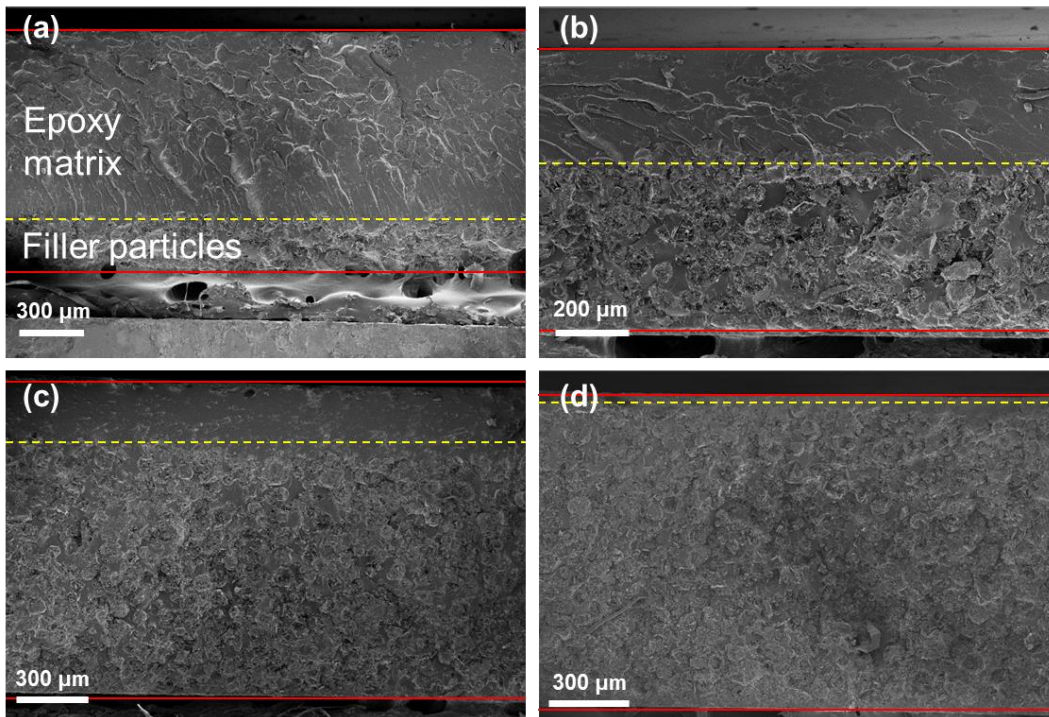

**Figure S1.** Cross-sectional FE-SEM images of epoxy composites filled with (a) 10%, (b) 20%, (c) 30%, and (d) 40% filler fraction of hybrid filler (1:1 wt ratio).

**Table S1.** Experimental condition for preparation of composites with various fillers, and their measured thermal diffusivities.

| Experimental # | Epoxy (g) | a-BN (g) | SAC305 (g) | Thermal diffusivity (mm <sup>2</sup> /s) |
|----------------|-----------|----------|------------|------------------------------------------|
| 1              | 3         | 0        | 0          | 0.146                                    |
| 2              | 3         | 0        | 0.165      | 0.15                                     |
| 3              | 3         | 0        | 0.375      | 0.156                                    |
| 4              | 3         | 0        | 0.645      | 0.152                                    |
| 5              | 3         | 0        | 1          | 0.161                                    |
| 6              | 3         | 0.165    | 0          | 0.166                                    |
| 7              | 3         | 0.375    | 0          | 0.214                                    |
| 8              | 3         | 0.645    | 0          | 0.308                                    |
| 9              | 3         | 1        | 0          | 0.602                                    |
| 10             | 3         | 0.165    | 0.165      | 0.236                                    |
| 11             | 3         | 0.375    | 0.375      | 0.264                                    |
| 12             | 3         | 0.645    | 0.645      | 0.444                                    |
| 13             | 3         | 1        | 1          | 0.957                                    |

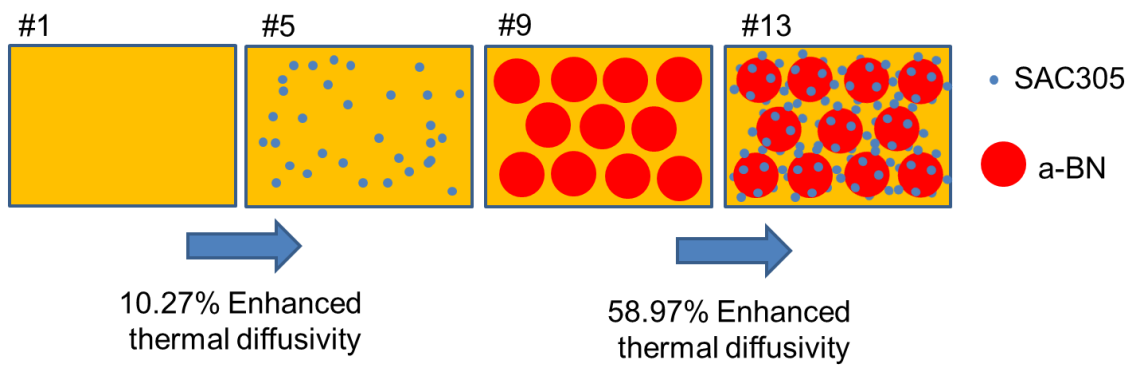

**Figure S2.** Schematic of the composites of #1, #5, #9, and #13 in Table S1, and the thermal diffusivity enhancement ratio of #1 to #5 and #9 to #13.

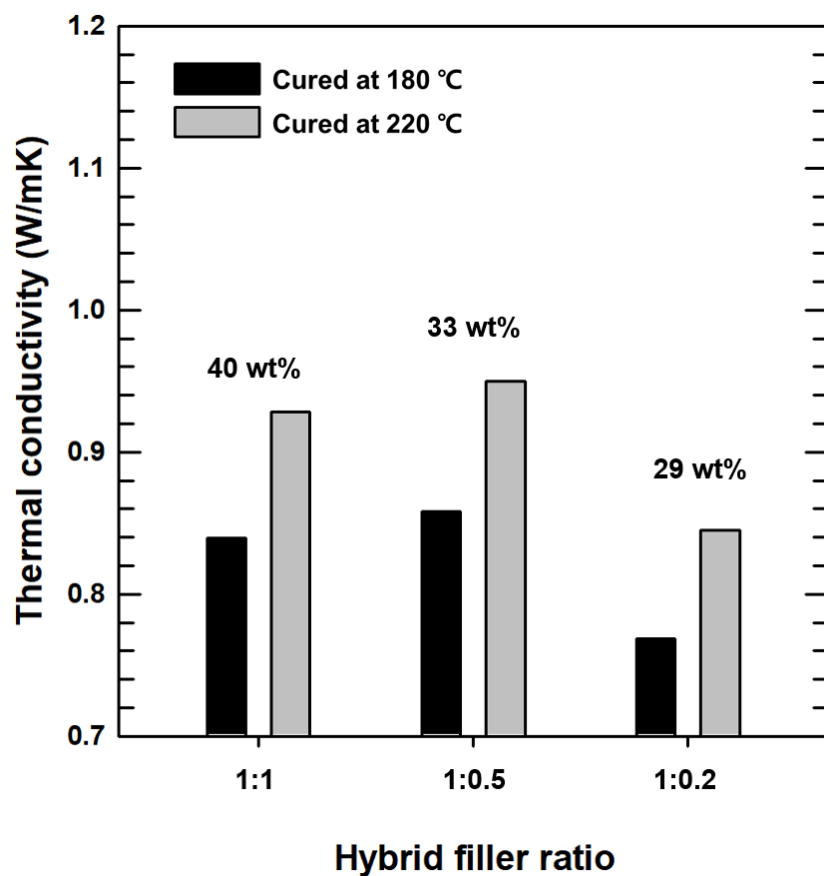

**Figure S3.** Thermal conductivity of the composites filled with 40% filler fraction of hybrid filler (1:1 wt ratio), 33% filler fraction of hybrid filler (1:0.5 wt ratio), and 29% filler fraction (1:0.2 wt ratio) of hybrid filler cured at 180 °C and 220 °C.

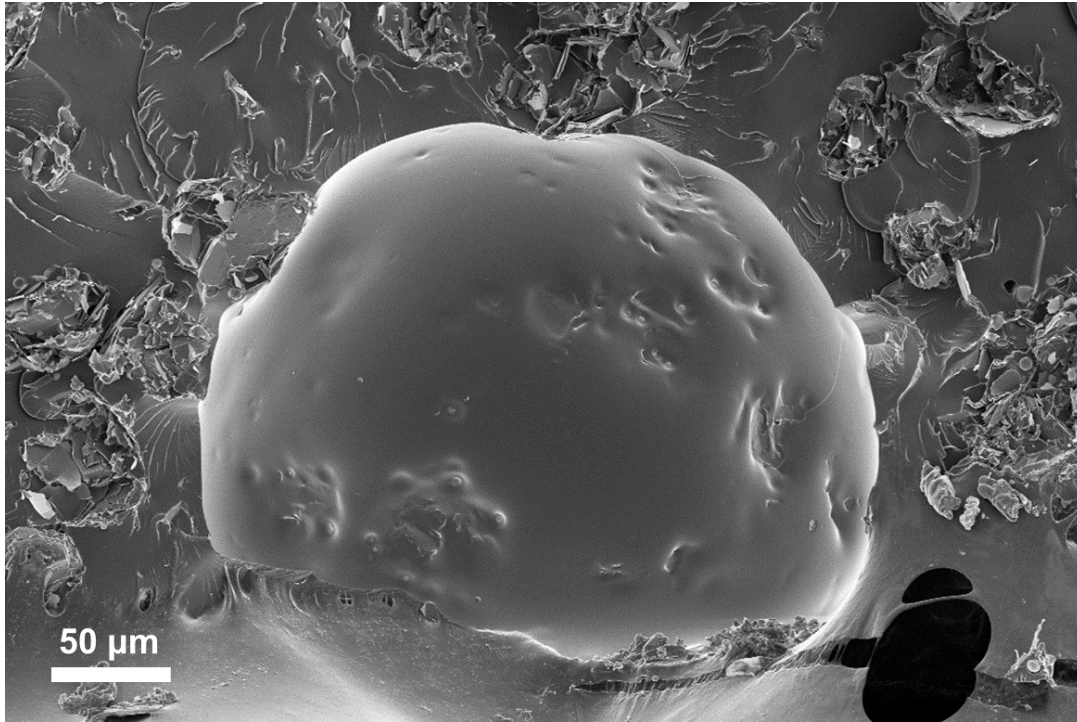

**Figure S4.** FE-SEM image of over coalesced SAC305 particle in fractured surface of the composite when curing temperature set to 220 °C for 30 min.
